# Supplementary material for: TNFα blockade overcomes resistance to anti-PD-1 in experimental melanoma
Source: PubMed Central journal article supplement (PMC5741628; doi:10.1038/s41467-017-02358-7), 2017-12-22
Supplement: 41467_2017_2358_MOESM1_ESM.pdf [file 41467_2017_2358_MOESM1_ESM.pdf]

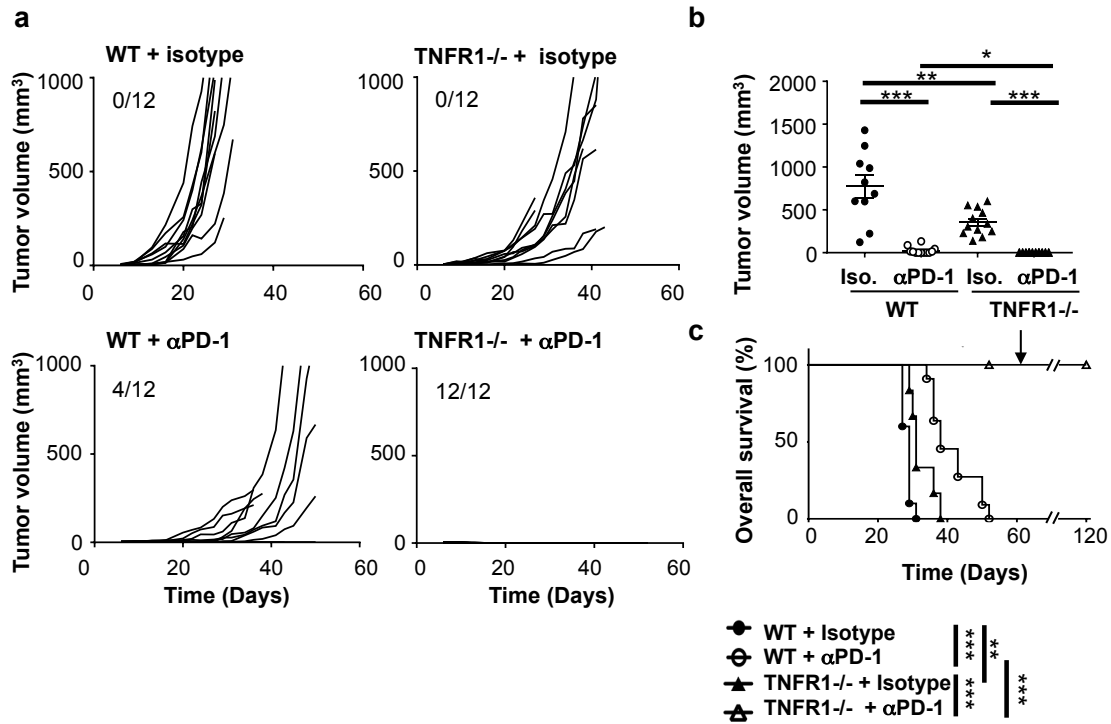

**Supplementary Figure 1: TNFR1 deficiency strongly enhances the anti-PD-1 response in experimental melanoma.** C57BL/6 wild-type (WT) and TNFR1-deficient mice were intradermally and bilaterally grafted with  $3 \times 10^5$  B16K1 melanoma cells prior to intraperitoneal injection of anti-PD-1 antibodies ( $\alpha$ PD-1, 10 mg kg<sup>-1</sup>) or a relevant isotype control (Iso, 10 mg kg<sup>-1</sup>) at days 6, 9 and 13 (n=6 mice per group). **a**, Tumor volumes were determined with a calliper. Individual curves are depicted for each tumor. Numbers indicate how many tumors regressed out of total tumors. Results are representative of two experiments. **b**, Values determined at day 27 for individual tumors are depicted. Bars represent mean values  $\pm$  s.e.m and are representative of two experiments. A Mann-Whitney U test was used and differences were considered to be statistically significant when  $p < 0.05$  (\* $p < 0.05$ ; \*\* $p < 0.01$ ; \*\*\* $p < 0.001$ ). **c**, Cumulative survival curves. At day 60, surviving mice were challenged with a second injection of B16K1 cells as indicated by the arrow. For statistical analysis of survival, the log-rank test was used and differences were considered to be statistically significant when  $p < 0.05$  (\*\* $p < 0.01$ ; \*\*\* $p < 0.001$ ).

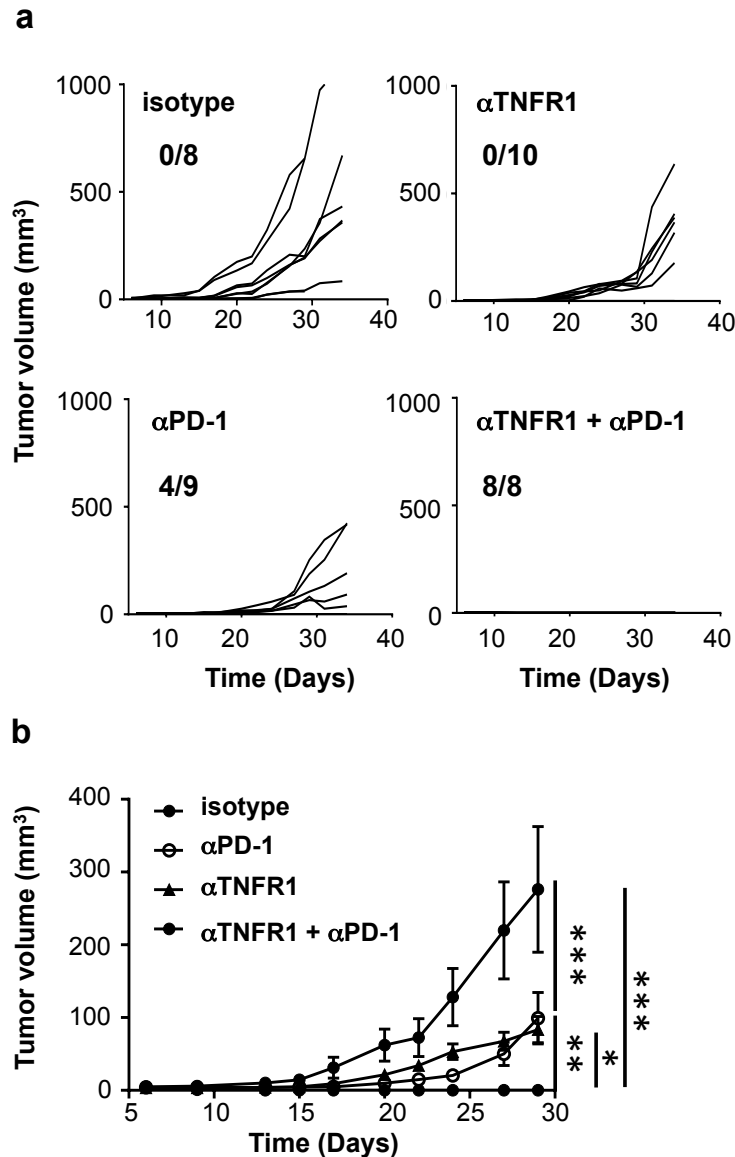

**Supplementary Figure 2: anti-TNFR1 blocking antibodies potentiate anti-PD-1 efficacy.** C57BL/6 WT mice were intradermally and bilaterally grafted with  $3 \times 10^5$  B16K1 melanoma cells. Mice received two injections of anti-TNFR1 and anti-PD-1 antibodies at days 6 and 9 ( $10 \text{ mg kg}^{-1}$ ) alone or in combination. Alternatively, mice were injected with isotype control. Tumor volumes were determined with a calliper at the indicated days. **a**, Individual curves are depicted for each tumor. Numbers indicate how many tumors regressed out of total tumors. **b**, Data are means  $\pm$  s.e.m. of at least 4 mice per group of one experiment. A two-way Anova with Tukey multiple comparison test was used and differences were statistically significant (\* $p < 0.05$ ; \*\* $p < 0.01$ ; \*\*\*  $p < 0.001$ ) at the indicated times.

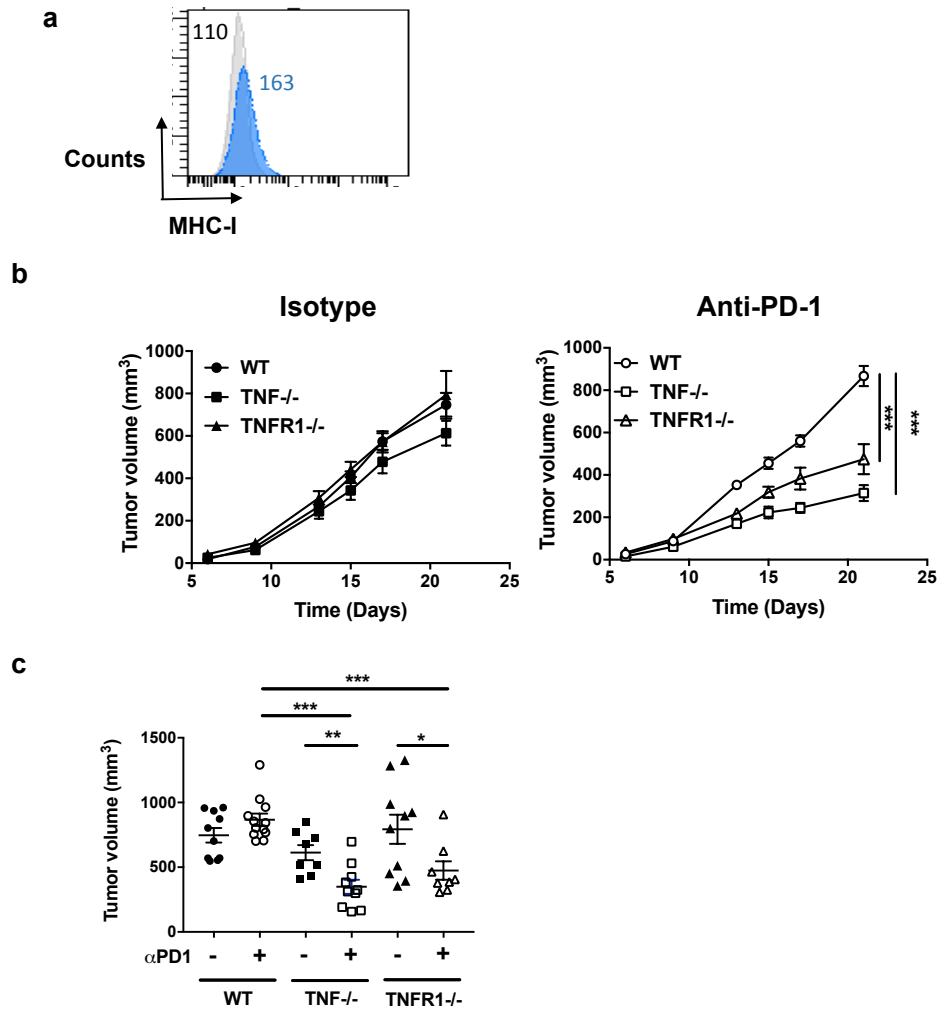

**Supplementary Figure 3: Deficiency in TNF or TNFR1 potentiates anti-PD-1 therapy in established Lewis lung carcinoma (LLC) tumors.** **a**, MHC-I expression level on LLC was evaluated using flow cytometry: blue histogram, MHC-I staining; grey histogram, isotype control. Numbers indicate the mean fluorescence intensity. C57BL/6 wild-type (WT), TNF-deficient (TNF<sup>-/-</sup>) and TNFR1-deficient (TNFR1<sup>-/-</sup>) mice were intradermally and bilaterally grafted with  $4 \times 10^5$  LLC cells prior to intraperitoneal injection of anti-PD-1 antibodies ( $\alpha$ PD-1,  $10 \text{ mg kg}^{-1}$ ) or a relevant isotype control (Ctrl,  $10 \text{ mg kg}^{-1}$ ) at days 6, 9 and 13. **b**, Tumor volumes were determined with a calliper at the indicated days. Data are mean  $\pm$  s.e.m of at least 4 mice per group analysed in one experiment. A two-way Anova with Tukey multiple comparison test was used and differences were statistically significant (\* $p < 0.05$ ; \*\* $p < 0.01$ ; \*\*\*  $p < 0.001$ ) at day 21. **c**, Values determined at day 21 for individual tumors are depicted. Bars represent mean values  $\pm$  s.e.m. A Mann-Whitney U test was used and differences were considered to be statistically significant when  $p < 0.05$  (\* $p < 0.05$ ; \*\* $p < 0.01$ ; \*\*\* $p < 0.001$ ) (b, c).

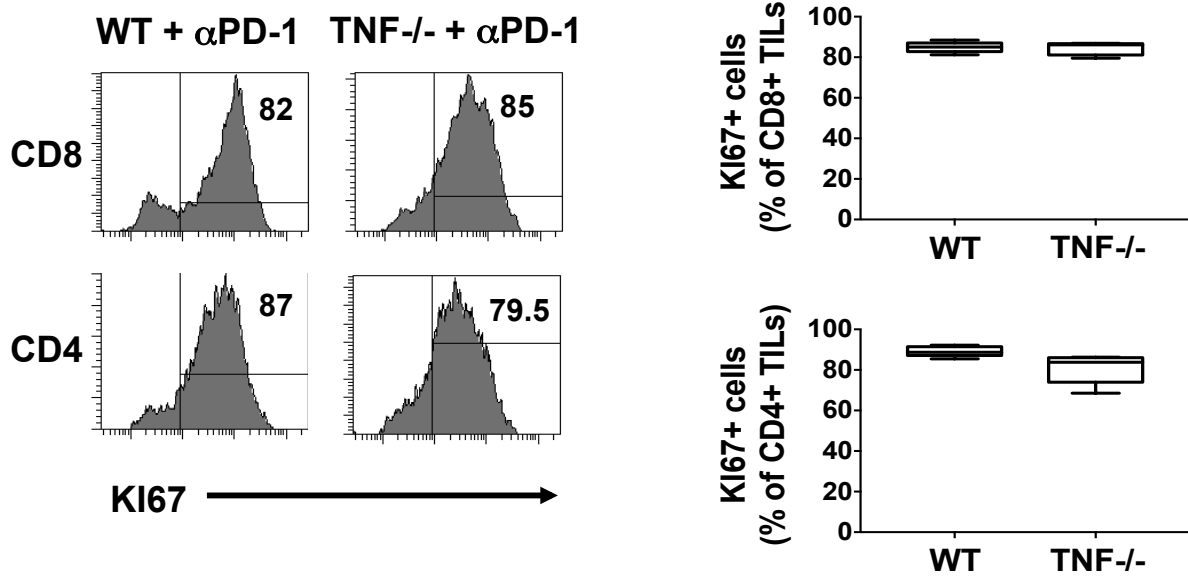

**Supplementary Figure 4: TNF deficiency did not modify cell proliferation in CD4+ and CD8+ TIL upon anti-PD-1 therapy.** C57BL/6 wild-type (WT) and TNF-deficient (TNF<sup>-/-</sup>) mice were injected as described in the legend to Fig. 2. At day 10, the TIL content was analysed by flow cytometry. The proportion of CD8+ and CD4+ TILs expressing KI67 was evaluated. Left panels: representative stainings. Right panels: values from one experiment measured in 6 tumors per group are represented as Tukey boxes. No significant differences were found between both groups when using a Mann-Whitney U test.

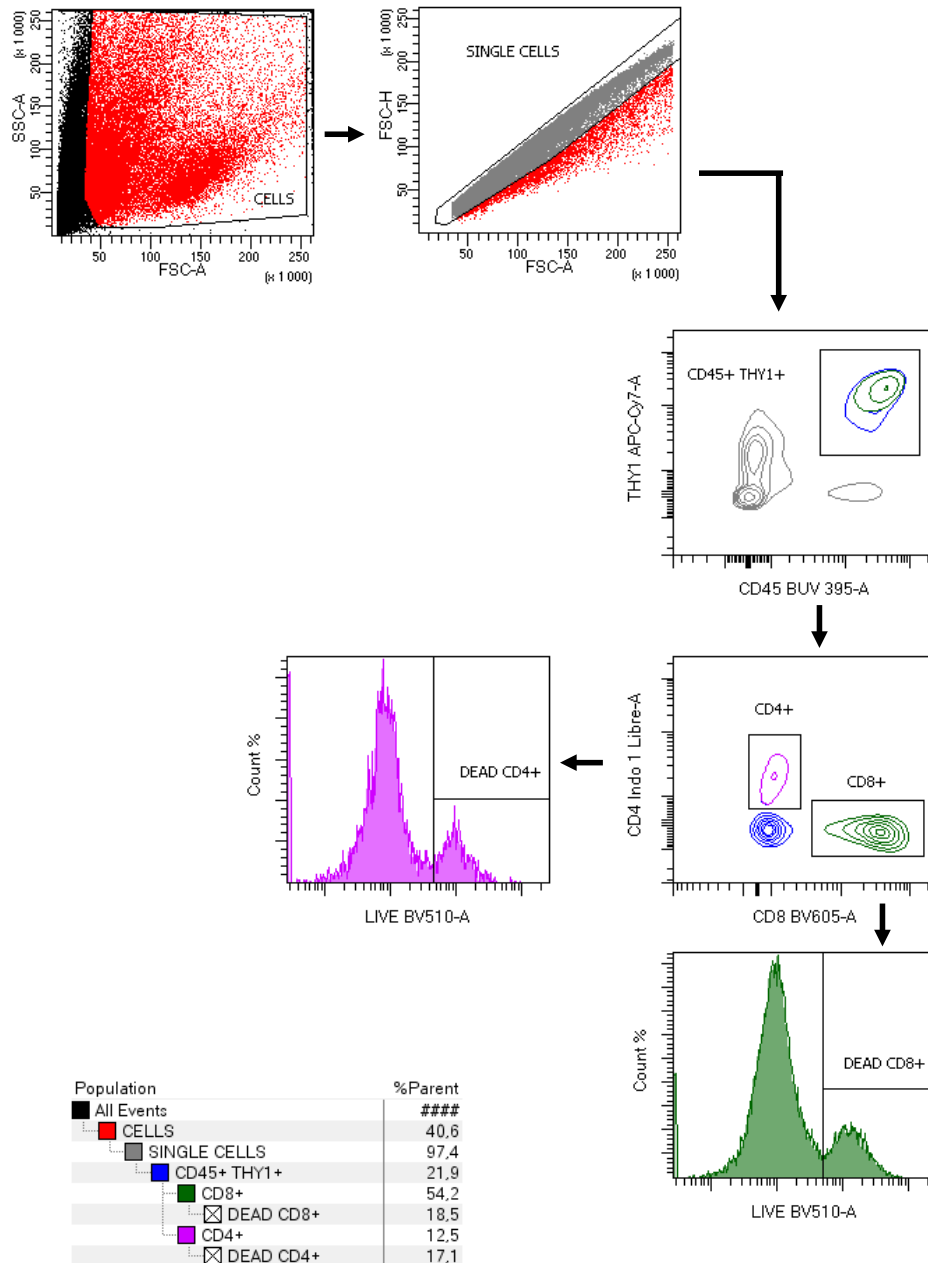

**Supplementary Figure 5: Analysis of cell death in TILs.** Mice were intradermally and bilaterally grafted with  $1 \times 10^6$  B16K1 melanoma cells. At day 10, tumors were collected and dissociated, and tumor cell content was analysed by using flow cytometry after cell incubation with Live/dead reagents, anti-CD45, anti-Thy1, anti-CD4 and anti-CD8 antibodies. The gating strategy of TIL was as follows: (i) cell debris were first excluded from the analysis by using FSC-A and SSC-A parameters; (ii) analysis was next restricted to single cells by using FSC-A and FSC-H parameters; (iii) CD4+ TILs and CD8+ TILs were next gated among CD45+Thy+ cells; (iv) Live/dead reagent staining was analysed as indicated to determine the proportion of dead cells among CD4+ and CD8+ TILs.

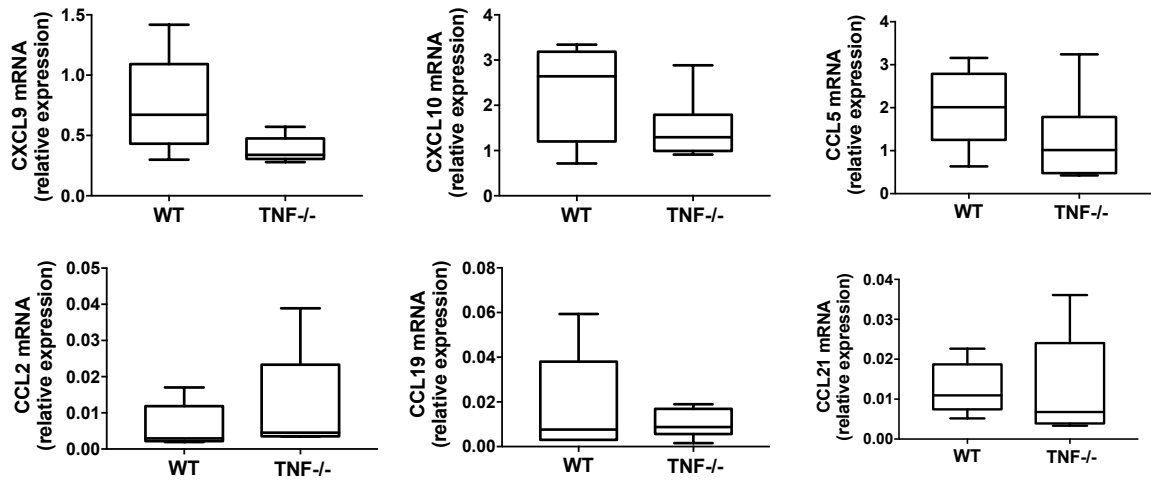

**Supplementary Figure 6: Chemokine mRNA expression analysis.** C57BL/6 wild-type (WT) and TNF-deficient (TNF<sup>-/-</sup>) mice were intradermally and bilaterally grafted with  $1 \times 10^6$  B16K1 melanoma cells prior to intraperitoneal injection of anti-PD-1 antibodies ( $\alpha$ PD-1,  $10 \text{ mg kg}^{-1}$ ) at day 7. Chemokine transcript levels were quantified in tumors from 6 mice per group and relative expression was normalized to housekeeping gene. Data from one experiment are represented as Tukey box. No significant differences were found between both groups by using a Mann-Whitney U test.

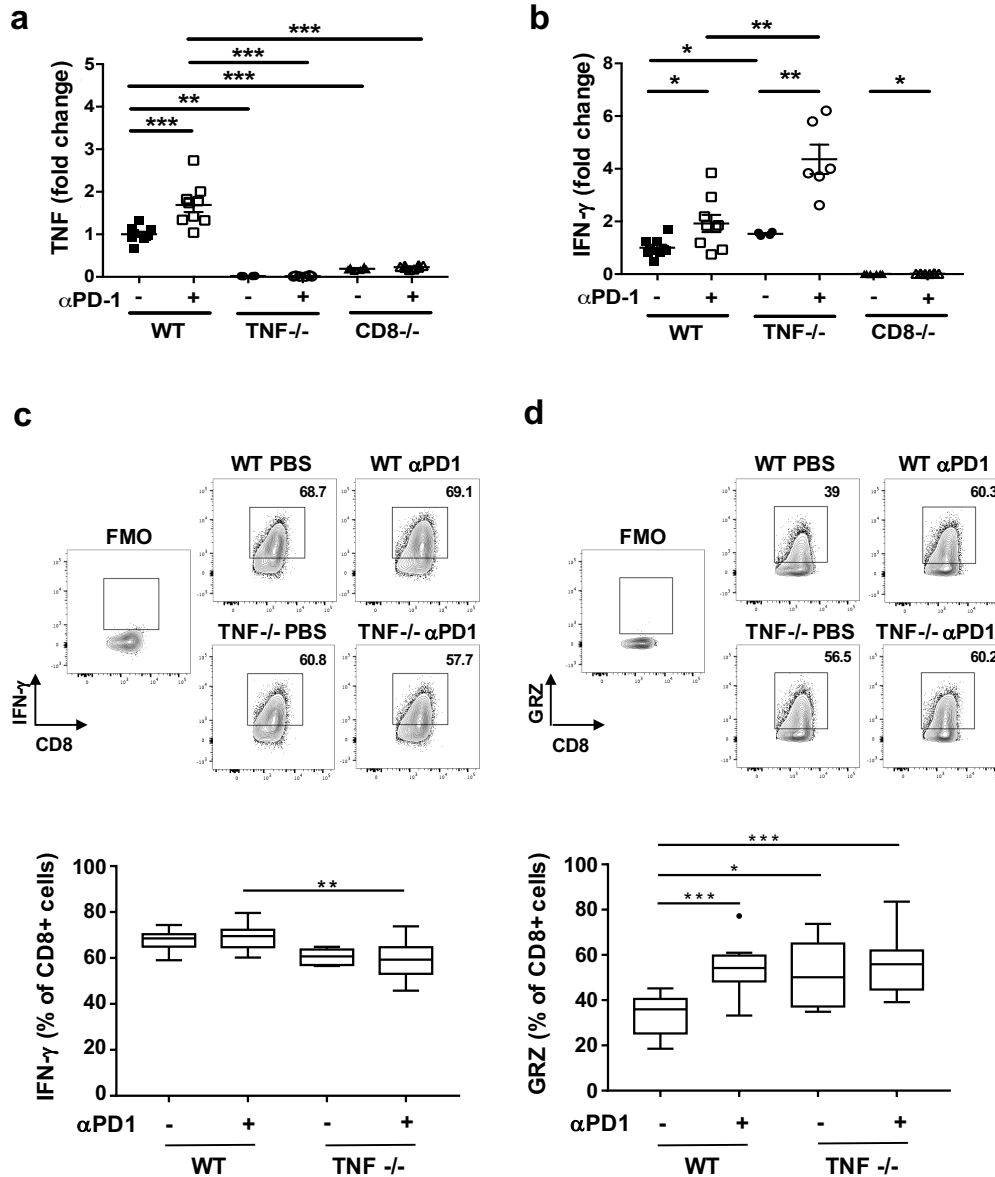

**Supplementary Figure 7: IFN- $\gamma$  and granzyme B production in wild-type and TNF-deficient mice.** C57BL/6 wild-type (WT), TNF-deficient (TNF<sup>-/-</sup>) and CD8-deficient (CD8<sup>-/-</sup>) mice were injected as described in the legend to Fig. 2. **a and b**, At day 10, TNF (a) and IFN- $\gamma$  (b) transcript levels were quantified in tumors. Data are means  $\pm$  s.e.m. of at least 4 tumors per group analysed in one experiment. (Mann-Whitney U test: \* $p$ <0.05; \*\* $p$ <0.01; \*\*\* $p$ <0.001). **c and d**, The TIL content was analysed by flow cytometry after 4 hours incubation with PMA and ionomycin. The proportion of CD8<sup>+</sup> TILs expressing IFN- $\gamma$  (c) and that of CD8<sup>+</sup> TILs expressing granzyme B (GRZ) (d) were determined. FMO: Fluorescence Minus One controls. Upper panels: representative stainings. Lower panels: values measured in 5-12 tumors per group from two experiments are represented as Tukey boxes. (Student's t test: \* $p$ <0.05; \*\* $p$ <0.01; \*\*\* $p$ <0.001).

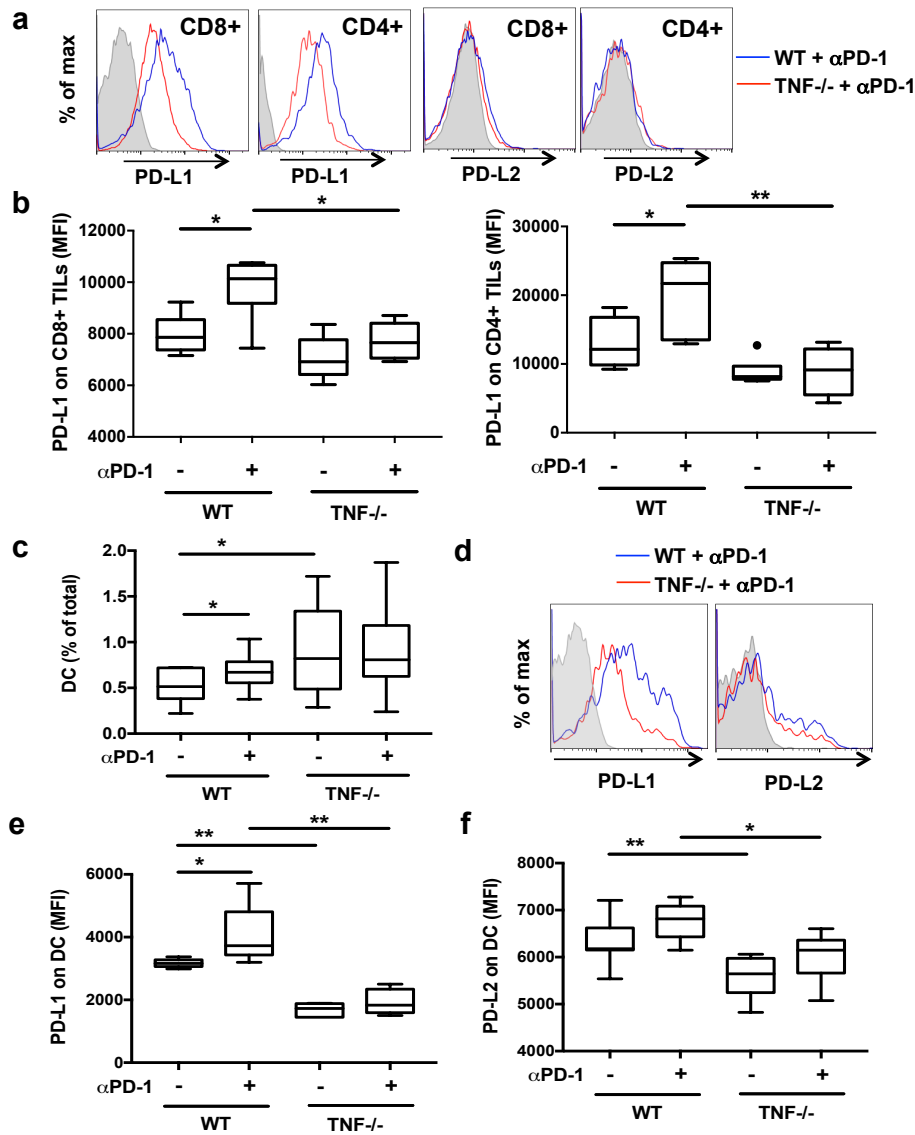

**Supplementary Figure 8: TNF induces PD-L1 and/or PD-L2 expression on TILs and DC.**

WT and TNF-deficient (TNF<sup>-/-</sup>) mice were injected as described in the legend to Fig. 2. TILs were analysed by flow cytometry on tumors developed at day 10. **a**, Representative staining for PD-L1 (left panels) and PD-L2 (right panels) on CD8<sup>+</sup> and CD4<sup>+</sup> TILs from WT and TNF-deficient mice injected with anti-PD-1. Grey histograms: isotype control. **b**, Mean of fluorescence intensity (MFI) for the PD-L1 staining on CD8<sup>+</sup> TILs (left panel) and CD4<sup>+</sup> TILs (right panel). **c**, Percentage of tumor DCs among total cells. **d-f**, Representative plots showing the expression of PD-L1 (left panel) and PD-L2 (right panel) on DCs in tumors from WT and TNF-deficient mice (d). Mean of fluorescence intensity (MFI) of PD-L1 (e) or PD-L2 (f) staining on DCs. **b, c, e and f**, Values measured in at least 6 tumors per group from one (out of two) representative experiment are represented as Tukey boxes (Mann-Whitney U test: \*p<0.05; \*\*p<0.01).



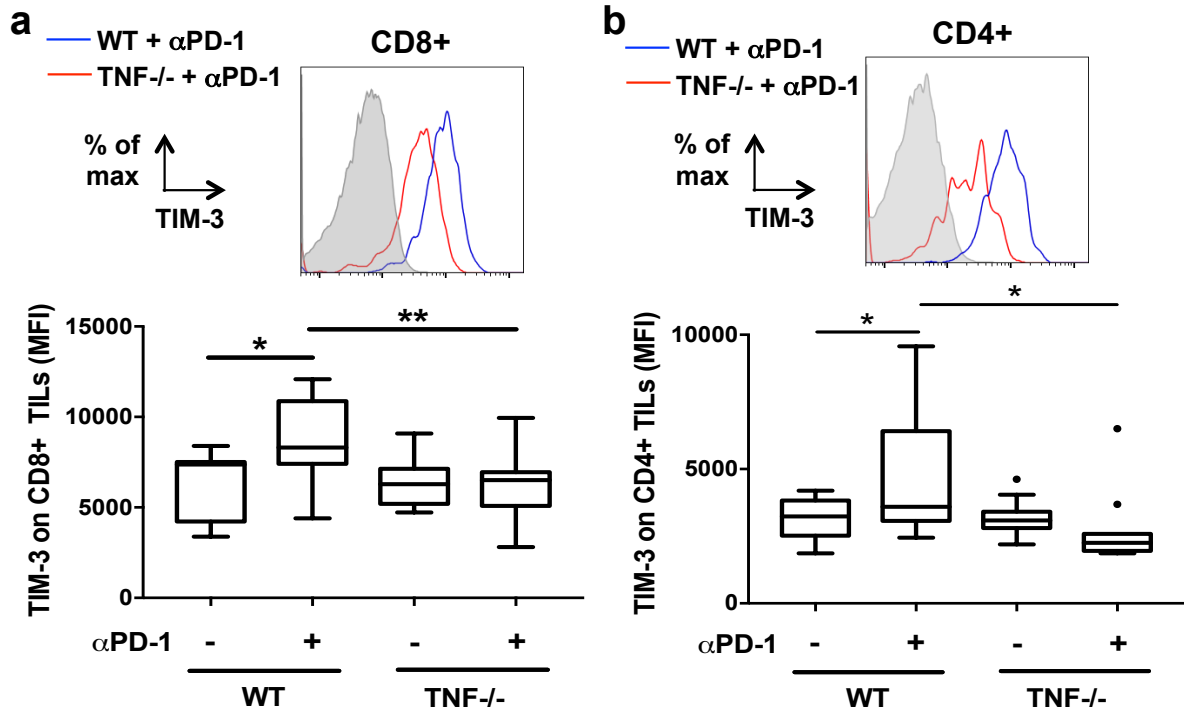

**Supplementary Figure 9: TNF deficiency impairs anti-PD-1-treated TIM-3 up-regulation on T lymphocytes.** a and b, WT and TNF-deficient (TNF<sup>-/-</sup>) mice were injected as described in the legend to Fig. 2. TIM-3 expression on CD8<sup>+</sup> (a) and CD4<sup>+</sup> TILs (b) was determined by flow cytometry on tumors developed at day 10. Upper panels: representative staining on TILs from WT (blue histogram) and TNF-deficient (red histogram) mice injected with anti-PD-1. Lower panels: Mean Fluorescence Intensity (MFI) measured in at least 11 tumors per group from two independent experiments are represented as Tukey boxes (Mann-Whitney U test: \*p<0.05; \*\*p<0.01).

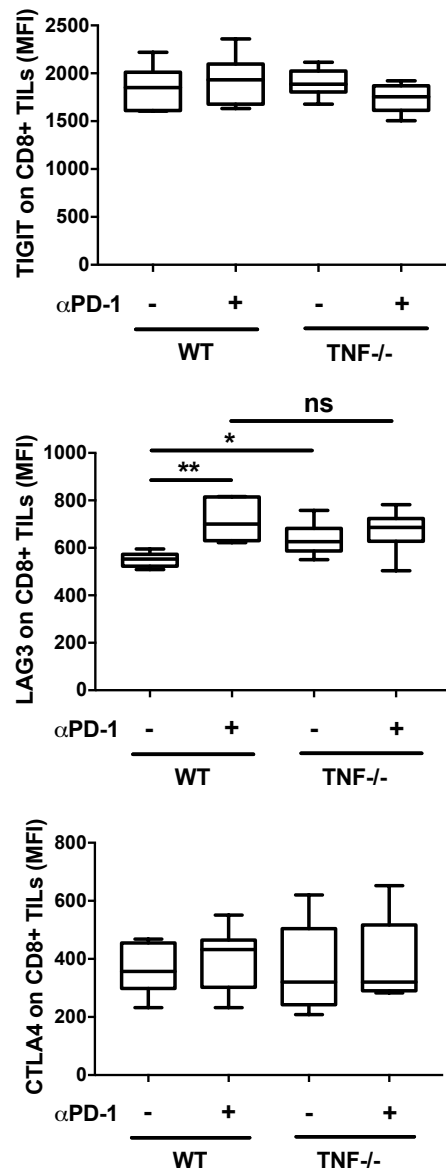

**Supplementary Figure 10: TNF does not induce TIGIT, LAG-3 and CTLA-4 expression on CD8+ TILs.** The mean of fluorescence intensity (MFI) of TIGIT, LAG3 and CTLA-4 staining on CD8+ TILs was determined by flow cytometry on tumors developed at day 10 in WT and TNF-deficient (TNF<sup>-/-</sup>) mice that had received one injection of anti-PD-1 antibodies ( $\alpha$ PD-1, 10 mg kg<sup>-1</sup>) or vehicle (PBS) at day 7. Values measured in at least 11 tumors per group from two independent experiments are represented as Tukey box. A Mann-Whitney U test was used (ns: not significant; \*p<0.05; \*\*p<0.01).

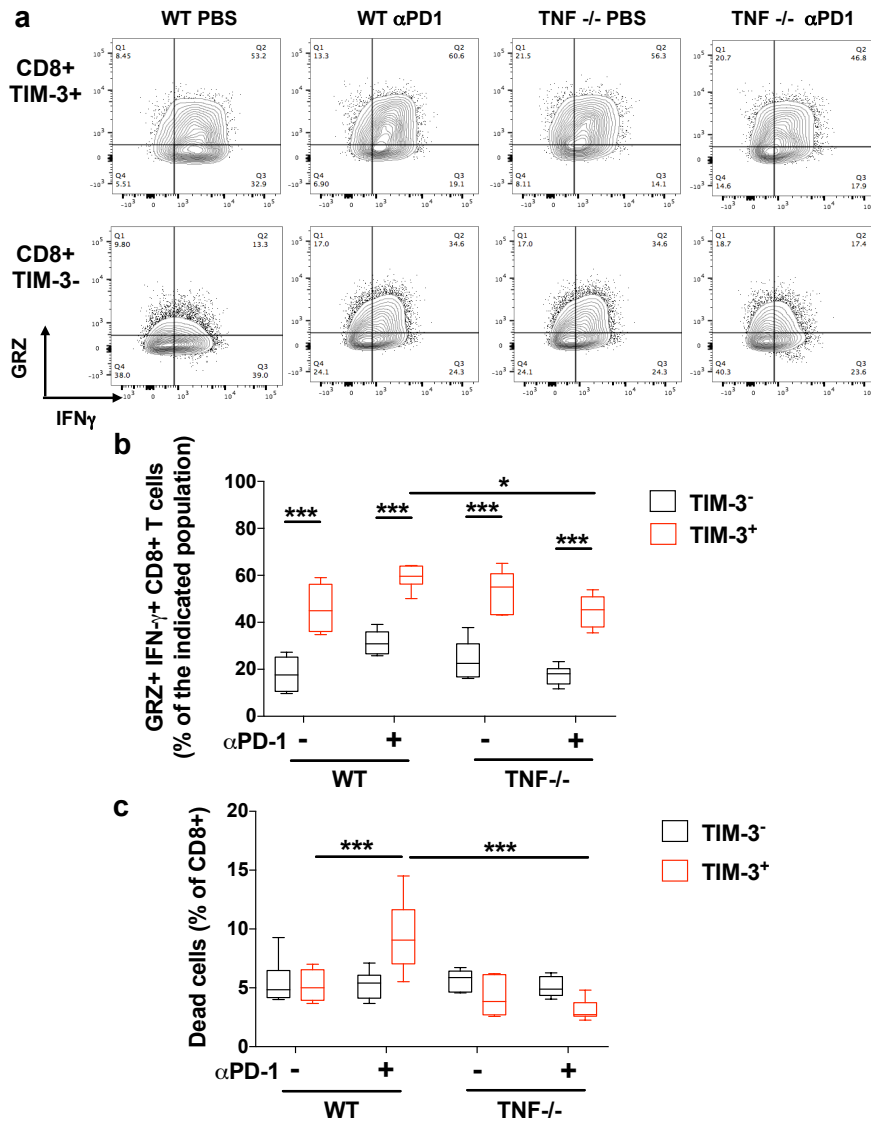

**Supplementary Figure 11: IFN- $\gamma$  and Granzyme B expression in TIM-3<sup>+</sup> and TIM-3<sup>-</sup> CD8<sup>+</sup> TILs.** WT and TNF-deficient (TNF<sup>-/-</sup>) mice were injected as described in the legend to Fig. 2. TILs from tumors developed at day 10 were stimulated with PMA/ionomycin in the presence of brefeldin A and the proportion of CD8<sup>+</sup> TILs expressing granzyme B (GRZ) and IFN- $\gamma$  was analysed by flow cytometry. **a**, Representative stainings; values indicate the proportion of cells in the different quadrants. **b**, Quantification of the proportion of GRZ<sup>+</sup> and IFN- $\gamma$ <sup>+</sup> cells among the TIM-3<sup>+</sup> and TIM-3<sup>-</sup> CD8<sup>+</sup> TILs. **c**, Proportion of cell death of the indicated populations among CD8<sup>+</sup> T cells. Values measured in 5-6 mice per group from one experiment are represented as Tukey boxes (b and c: Two-way Anova with Tukey's multiple comparison test: \* $p < 0.05$ ; \*\*\* $p < 0.001$ ).

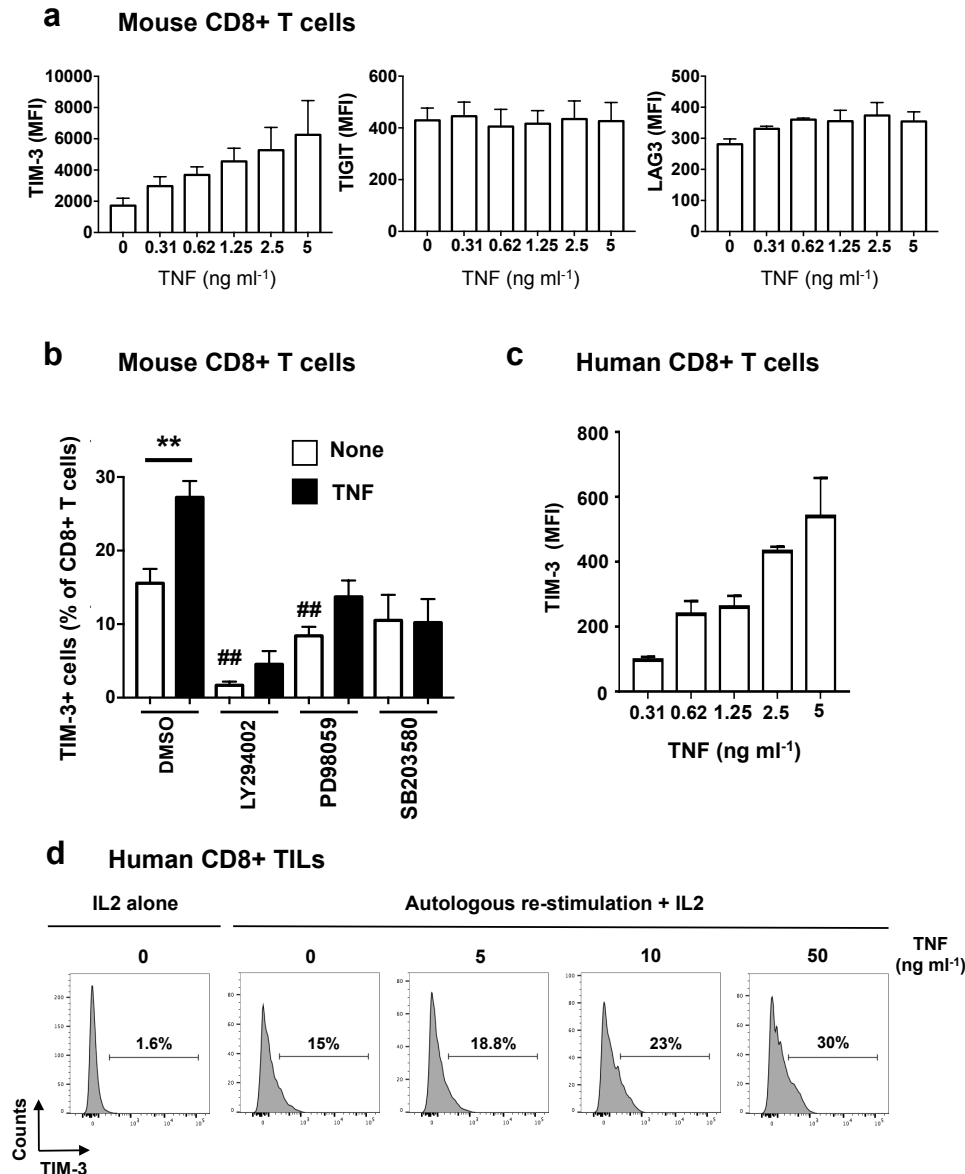

**Supplementary Figure 12: TNF dose-dependently induces TIM-3 up-regulation on activated CD8+ T lymphocytes *in vitro*.** **a**, Activated CD8+ T cells from WT mice were incubated with murine TNF for 2 days. The mean fluorescence intensity (MFI) of TIM-3, LAG3 and TIGIT was next analysed by flow cytometry. Data are means  $\pm$  s.e.m. of three independent experiments. **b**, Similar experiment as described in "a" was conducted by incubating cells with 1  $\mu$ M LY294002 (PI3K inhibitor), 10  $\mu$ M PD98059 (MEK inhibitor), 1  $\mu$ M SB203580 (p38 MAPK inhibitor) or vehicle (DMSO) in the presence or absence of 2.5 ng mL<sup>-1</sup> TNF. Percentages of CD8+TIM-3+ T cells were next determined by flow cytometry. Data are means  $\pm$  s.e.m. of four independent experiments. A Mann-Whitney U test was used and differences were statistically significant (\*\* $p < 0.01$ , TNF vs vehicle; ### $p < 0.01$ , LY294002 or PD98059 vs vehicle). **c**, Human CD8+ T cells were incubated with different concentrations of human TNF for 2 days. TIM-3 expression was next analysed by flow cytometry. Histograms represent the MFI after subtracting basal fluorescence intensity. Data are means  $\pm$  s.e.m. of two experiments. **d**, TILs from one human melanoma metastasis (patient 2) were cultured as described in Figs 4b and c with increasing concentrations of human recombinant TNF for 48h. TIM-3 expression on re-stimulated CD8+ TILs was analysed by flow cytometry.

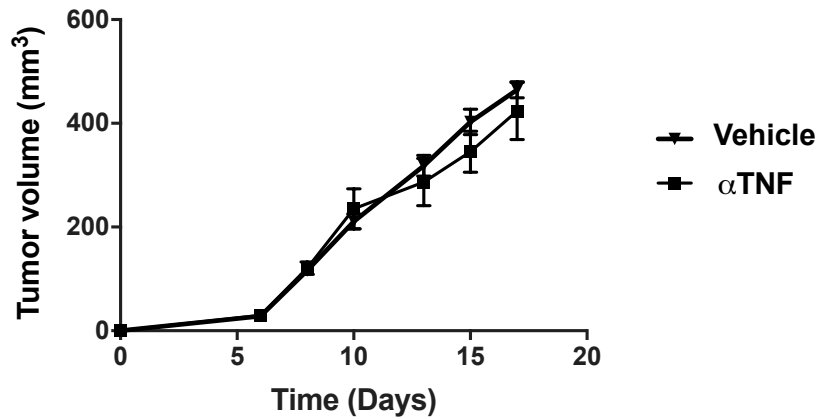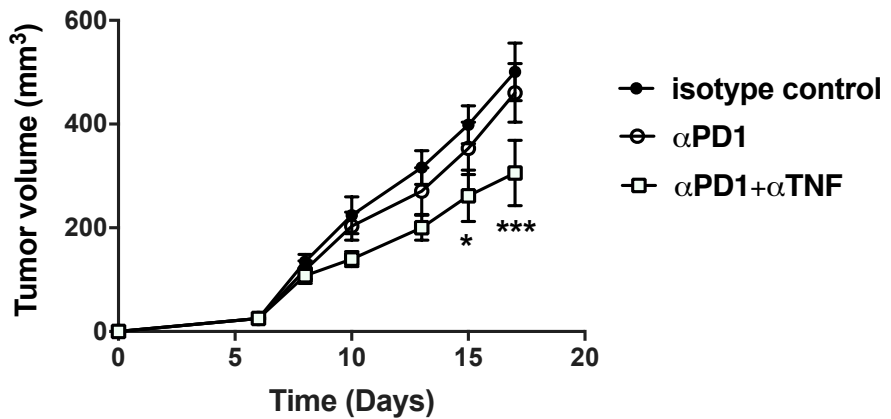

**Supplementary Figure 13: anti-TNF antibodies overcome the resistance to anti-PD-1 therapy in experimental breast carcinoma.**  $1 \times 10^5$  4T1 breast carcinoma cells were orthotopically injected into the mammary fat pad of WT Balb/c mice. Mice were next injected with vehicle, isotype control, anti-TNF, anti-PD-1 or the combination of anti-PD-1 and anti-TNF ( $10 \text{ mg kg}^{-1}$  of each antibody). A two-way Anova with Tukey multiple comparison test was used and differences were statistically significant (\* $p < 0.05$ ; \*\*\*  $p < 0.001$ ) at the indicated times between the group of mice, which received the combo anti-PD-1 and anti-TNF and the isotype control group. Data are mean values  $\pm$  s.e.m. of 6 mice per group from one experiment.
